# Supplementary material
Source: MDPI journal article supplement (https://www.mdpi.com/2311-7524/10/4/378)
Supplement: s1 [file horticulturae-2932793-supplementary.xlsx]

## Sheet: Munka1
			Growing chart
			recovering								pinhead formation										I. flush					in between period				II. flush
	days		0	1	2	3	4	5	6	7	8	9	10	11	12	13	14	15	16	17	18	19	20	21	22	23	24	25	26	27	28	29	30	31	32	33
	watering (L/m²)		8	9	0	1	2	2			B	B	B	B											6	6
	RH (%)			95	98	98	98	99	100	100	96	95	94	93	92	91	90	89	88	87.5	87	87	87	87	87	85	85	85	85	85	85	86	87	86	85	85
	CO2 (ppm)						6000	6000	6000	6000	3500	3000	2500	2300	2000	1900	1800	1700	1600	1500	1500	1500	1500	1500	1500	1500	1500	1500	1500	1500	1500	1500	1500	1500	1500	1500
	compost (˚C)		20	23	26	25	25	25	26	27	26	25	24	23	22	21	20.5	20.2	20	19.5	19	19	19.5	21	23.5	23	21	20	19.5	19	19	19.5	20	19	19	19
	air (˚C)		19	16	16	17	18.5	20	21	21	20	19	18.5	18	17.6	17.3	17.2	17	17	17	16.5	16.5	16.8	17.5	18.5	18.5	17	17	17	17	17	17.5	17.5	17.5	17.5	17.5
	fan (%)		60	80	80	70	50	50	30	20	40	40	35	35	33	33	30	30	30	30	30	35	40	40	45	35	35	35	30	30	30	30	30	30	30	30
